# Supplementary material for: Rapid relative increase of crustose coralline algae following herbivore exclusion in a reef of El Salvador
Source: PeerJ. 2021 Feb 11;9:e10696. doi: 10.7717/peerj.10696 (PMC7882140; doi:10.7717/peerj.10696)
Supplement: Supplemental Information 2 [file peerj-09-10696-s002.xlsx]

## Sheet: Hoja1
Taxa	Cage 1B	Control 1B	Cage 2B	Control 2B	Cage 3B	Control 3B	Cage 4B	Control 4B	Cage 1A	Control 1A	Cage 2A	Control 2A	Cage 3A	Control 3A	Cage 4A	Control 4A
Padina				1	3	1		2				3			2			B = before
Dictyota		1							5	3		15	3	3	8	5		A = after
Sargassum
Colpomenia		1
Codium		1
Halimeda	1	2	1	3	2	1	3	1	10	3		10	5	15	10
Cladophora			4												20
Ceranium		5
Acanthophora
CCA 1						1		3	50	25	60	20	70	30	50	10
CCA 2	2	3		1	5		4	2		5						2
CCA 3											20		7
Turf	88	75	85	85	85	81	77	78		20	4	30		20	4	60
Unidentified alga 1			3
Unidentified alga 2		1		3		5	10	8								2
Unidentified alga 3				1
Unidentified alga 4	3	4
Porites lobata	6	7	7	6	5	6	6	5	6	7	6	6	7	7	6	5
Cliona								1
Sand									5			6		5		8
Rock									19	30	10	10	8	20		8
Pocillopora rest						5			5	7
