# Supplementary material for: Rapid relative increase of crustose coralline algae following herbivore exclusion in a reef of El Salvador
Source: PeerJ. 2021 Feb 11;9:e10696. doi: 10.7717/peerj.10696 (PMC7882140; doi:10.7717/peerj.10696)
Supplement: Supplemental Information 3 [file peerj-09-10696-s003.xlsx]

## Sheet: Hoja1
Colony	Treatment	Time	Coral.area	Coral.cover	crustose.cover	turf.cover	CC	CC SD	turf	turf CC
Yellow cage	cage	before	270	6	0	88	0	0	83.75	4.71699
Orange cage	cage	before	312	7	0	85
Blue cage	cage	before	250	5	0	85
Wire cage	cage	before	300	6	0	77
Control Yellow cage	control	before	326	7	0	75	1	1.41421	79.75	4.272
Control Orange cage	control	before	280	6	0	85
Control Blue cage	control	before	288	6	1	81
Control Wire cage	control	before	224	5	3	78
Yellow cage	cage	after	400	6	50	0	57.5	9.57427	2	2.3094
Orange cage	cage	after	330	6	60	4
Blue cage	cage	after	351	7	70	0
Wire cage	cage	after	380	6	50	4
Control Yellow cage	control	after	280	7	25	20	22.5	8.66025	16.5	7
Control Orange cage	control	after	280	6	25	20
Control Blue cage	control	after	216	7	30	20
Control Wire cage	control	after	300	5	10	6

## Sheet: Hoja2
Colony	Treatment	Time	Coral.area	Coral.cover	crustose.cover		turf.cover
Yellow cage	cage	before	270	6	0	0	88	83.75
Orange cage	cage	before	312	7	0	0	85	4.71699
Blue cage	cage	before	250	5	0		85
Wire cage	cage	before	300	6	0		77
Control Yellow cage	control	before	326	7	0	1	75	79.75
Control Orange cage	control	before	280	6	0	1.41421	85	4.272
Control Blue cage	control	before	288	6	1		81
Control Wire cage	control	before	224	5	3		78
Yellow cage	cage	after	400	6	50	57.5	0	2
Orange cage	cage	after	330	6	60	9.57427	4	2.3094
Blue cage	cage	after	351	7	70		0
Wire cage	cage	after	380	6	50		4
Control Yellow cage	control	after	280	7	25	22.5	20	16.5
Control Orange cage	control	after	280	6	25	8.66025	20	7
Control Blue cage	control	after	216	7	30		20
Control Wire cage	control	after	300	5	10		6
CCA	cage	57.5
CCA	control	21.5
Turf	cage	81.75
Turf	control	63.25
