# Supplementary material for: Rapid relative increase of crustose coralline algae following herbivore exclusion in a reef of El Salvador
Source: PeerJ. 2021 Feb 11;9:e10696. doi: 10.7717/peerj.10696 (PMC7882140; doi:10.7717/peerj.10696)
Supplement: Table S1 [file peerj-09-10696-s001.xlsx]

## Sheet: Hoja1
		El Faro			Decameron
		2018-04-16	2018-04-16	2018-04-18	2018-04-19	2018-04-17	2018-04-17	2018-04-19
Taxa	Taxa	T1 300	T2 300	T3 300	T4 300	T5 300	T6 300	T4 300
Phaeophyta	Padina	7	9	10		2	2	8
	Ralfsia	1		3	2	5
	Colpomenia				1	1
	Dictyota	18	11	15	1	3	8	4
Chlorophyta	Codium	2		1		2	32	17
	Halimeda	7	4	12	25	22	10	24
Rhodophyta	Galaxaura	1	8	4	2		3	1
	Ceramium	1	1	1	3	6	8	4
	Pleonosporium
	Acanthophora				23
crustose Coralline Algae (Corallinales) (Rhodophyta)	CCA 1	3	8	8		4	2	4
	CCA 2	4	2	6	13	6	2	4
	CCA 3						1	3
Turf algae	Turf	27	34	13	21	40	26	24
Sponges (Porifera)	Cliona
Cnidaria	Porites lobata	6	6	1				1
Rhodoliths	Rhodolith yellow	1	2	1		1
	Sand	15	3	25	10	8	1	3
	Rock	1	2				1	4
	Pocillopora skelleton	6	9
	Total	100	99	100	101	100	96	101
	Total organisms	78	85	75	91	92	94	94
	Total species	12	10	12	9	11	10	11
	Green Algae	9	4	13	25	24	42	41
	Brown Algae	26	20	28	4	11	10	12
	Red Algae	2	9	5	28	6	11	5
	CCA	7	10	14	13	10	5	11
	Turf	27	34	13	21	40	26	24
	Green Algae	9	4.0404	13	24.7525	24	43.75	40.5941
	Brown Algae	26	20.202	28	3.9604	11	10.4167	11.8812
	Red Algae	2	9.09091	5	27.7228	6	11.4583	4.9505
	CCA	7	10.101	14	12.8713	10	5.20833	10.8911
	Turf	27	34.3434	13	20.7921	40	27.0833	23.7624
	Padina	7	9.09091	10	0	2	2.08333	7.92079
	Ralfsia	1	0	3	1.9802	5	0	0
	Compomenia	0	0	0	0.990099	1	0	0
	Dictyota	18	11.1111	15	0.990099	3	8.33333	3.9604
	Codium	2	0	1	0	2	33.3333	16.8317
	Halimeda	7	4.0404	12	24.7525	22	10.4167	23.7624
